# Supplementary material
Source: HighWire-hosted journal article supplement (http://www.cmaj.ca/highwire/filestream/58753/field_highwire_adjunct_files/0/salon-biringer-online_appendix.pdf)
Supplement: salon-biringer-online_appendix.pdf [file salon-biringer-online_appendix.pdf]

## ONLINE APPENDIX

### REFERENCES

1. Sullivan P. Women now outnumber men in family medicine, CMA data show. Canadian Medical Association. Available <http://www.cma.ca/women-outnumber-men-family-medicine> (accessed 9 Feb. 2012.)
2. 2010 National Physician Survey. The College of Family Physicians of Canada, Canadian Medical Association, The Royal College of Physicians and Surgeons of Canada. Available [http://www.nationalphysiciansurvey.ca/nps/2010\\_Survey/2010nps-e.asp](http://www.nationalphysiciansurvey.ca/nps/2010_Survey/2010nps-e.asp) (accessed 29 May 2012).
3. Levinson W, Lurie H. When most doctors are women. What lies ahead? *Ann Int Med* 2004;141(6):471-4.
4. Contandriopoulos A-P, Fournier M-A. Feminization de la profession medicale et la transformation de la pratique au Quebec. Groupe de recherche interdisciplinaire en Santé, Université de Montréal; November 2007. Available [http://www.amq.ca/fra/PDF/feminisation\\_final.pdf](http://www.amq.ca/fra/PDF/feminisation_final.pdf) (accessed 29 May 2012).
5. Boulis AK, Jacobs JA. *The changing face of medicine: women doctors and the evolution of health care in America*. Cornell University Press; 2008.
6. Heru A. Pink-collar medicine: women and the future of medicine. *Gender Issues* 2005;22(1):20-34.
7. McKinstry B, Colthart I, Elliott K, Hunter C. The feminization of the medical work force, implications for Scottish primary care: a survey of Scottish general practitioners. *BMC Health Services Research*. 2006;6:56.
